# Supplementary material for: Machine learning-aided protein identification from multidimensional signatures
Source: Royal Society of Chemistry journal article supplement (doi:10.1039/d0lc01148g), 2021-01-01
Supplement: d0lc01148g1.xlsx [file d0lc01148g1.xlsx]

## Sheet: Sheet2
	Repeat #	Tyr/OPA	UV/OPA	R_h	conc. (uM)
BSA (Mw = 69 kDa)	r1	0.424076	0.0805218	3.48	15
	r2	0.522523	0.113468	3.6	15
	r3	0.341444	0.0812831	3.13	30
	r4	0.421714	0.0945509	3.6	30
b-lac (Mw = 19.8 kDa)	r1	0.342928	1.16157	2.34	353
	r2	0.262519	0.915566	2.48	353
	r3	0.17372	0.697546	2.56	353
	r4	0.184917	0.440793	2.36	353
b_casine (Mw = 25.1 kDa)	r1	0.719373	0.776353	3.77	300
	r2	0.790012	0.449222	4.22	300
	r3	1.23529	0.97032	3.66	150
	r4	1.09589	0.926471	3.82	150
glucose oxidase (Mw = 65.6 kDa)	r1	0.631241	3.32992	3.74	30
	r2	0.669276	2.75041	3.24	30
	r3	0.419744	4.28869	3.5	114
	r4	0.55084	2.66587	3.98	114
A-lac (Mw = 16.2 kDa)	r1	0.541467	0.696172	1.63	231	s
	r2	0.461847	0.701121	1.98	231
	r3	0.421778	0.59791	1.6	231
	r4	0.406805	0.502441	1.93	231
ovalbumin (Mw = 42.7 kDa)	r1	0.655304	0.508975	3.14	232
	r2	0.486289	0.401046	2.78	232
	r3	0.44269	0.504498	2.9	232
	r4	0.634854	0.60981	3.1	232
Alcohol dehydrogenase (Mw = 36.8 kDa)	r1	0.953259	1.54633	3.4	92
	r2	1.01061	0.998302	3.32	92
	r3	0.801132	1.27846	3.45	140
	r4	0.907718	1.28086	3.36	140
Transferrin (Mw = 77 kDa)	r1	1.07703	0.2564	3.5	100
	r2	0.686802	0.184688	3.24	100
	r3	0.808818	0.233424	2.92	100
	r4	0.964824	0.201502	2.84	100
thyroglobulin (Mw = 303 kDa)	r1	0.0828945	2.82307	8	250
	r2	0.141642	1.48009	7.63	125
	r3	0.0535729	2.33529	8.74	520
	r4	0.0976074	2.15158	8.52	250
Ubiquitin (Mw = 22.4 kDa)	r1	0.711035	2.3656	3.25	135
	r2	0.546178	1.97516	2.85	135
	r3	0.771794	1.48477	3.09	135
	r4	0.626508	1.49635	2.88	135
